# Supplementary material
Source: PubMed Central journal article supplement (PMC3624568)
Supplement: JB.00016-13_zjb999092521so1.pdf [file JB.00016-13_zjb999092521so1.pdf]

Table S1. Oligonucleotide primers used in this study

| Primer name                   | Sequence (5'-3')                                      |
|-------------------------------|-------------------------------------------------------|
| EMSA and promoter assays      |                                                       |
| PramAFW                       | TGGGGAGTGGCGTCGAAAAG                                  |
| PramARV                       | CCGCTGGGTATCCACCTTCAG                                 |
| PramAmutFW                    | GGAAAAAACACTTCTATGAGTGTAATTCAGCAAACCTTGAGTTT<br>AGC   |
| PramAmutRV                    | TTACACTCATAGAAGTGTTTTTTCCTTGTGGAAAAAGTGAAATTA<br>TTGG |
| PcysKFW                       | TGAACATAGTCGAGGCGGATC                                 |
| PcysKRV                       | GTACACGTTGCCCATTTGTGG                                 |
| SP6Cy3                        | Cy3-CAGGCGGCCGCGAATTCAGTAGTG                          |
| T7                            | CTCACTATAGGGCGAATTGG                                  |
| Overexpression of <i>ramA</i> |                                                       |
| ramAFWKpn                     | TGGGTACCAGGAGGAAATCTGAAGGTGG                          |
| ramARVKpn                     | CTGGTACCGTGATTGAAACGGTGCG                             |
| Chromosomal mutations         |                                                       |
| ramA_integ_FW                 | TGATGTTTGCGCCGGTGGAGATGC                              |
| ramA_integ_RV                 | ACTCTAGAAGGAGTGCGATAAATGGAACG                         |
| qRT-PCR                       |                                                       |
| ramA_RT_FW                    | GAGAAGGATTCCGCGATTCAG                                 |
| ramA_RT_RV                    | ATCACGGGAACCTGCGACAA                                  |
| cysK_RT_FW                    | AATCCTTGCCCGCCAGTT                                    |

cysK\_RT\_RV

CAGTGGTTTCGCGGTGAA

5'-RACE

cysK\_RACE

GGAGATGCCGCCGAGGATGCCTTCGTCG

---

Figure S1

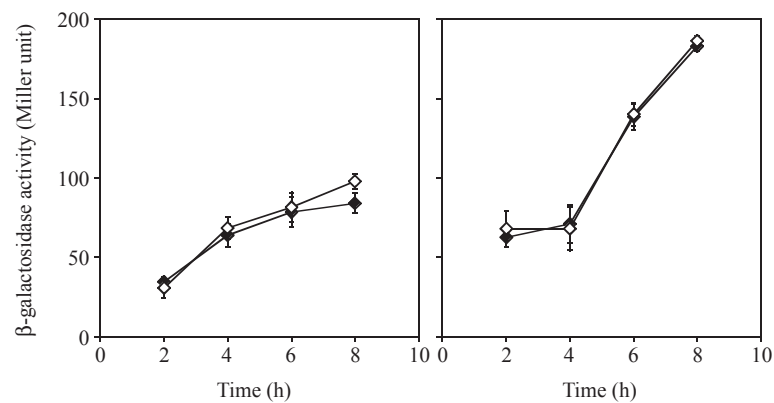

Figure S1. Effects of mutations in the GlxR binding site on activity of the *cysK* promoter-*lacZ* fusion. The  $\beta$ -galactosidase activities of the native (open) and mutated (filled) promoter-*lacZ* fusion during growth in A medium with 1% glucose (left) or acetate (right). The activity is mean values from three independent cultivations with standard deviations.

Figure S2

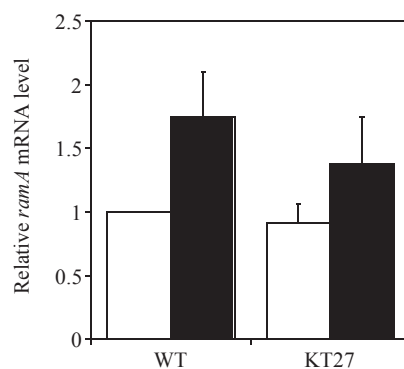

Figure S2. Expression level of *ramA* is not affected by GlxR binding site mutation. Total RNA was extracted from the wild type (WT) and strain KT27 growing exponentially on either glucose (white bars) or acetate (black bars). The mRNA levels of *ramA* were analyzed using qRT-PCR. The levels relative to the glucose-grown wild type are presented. Mean values obtained from three independent cultivations are shown with standard deviations.
